# Supplementary material for: Human IFT-A complex structures provide molecular insights into ciliary transport
Source: PubMed Central journal article supplement (PMC10066299; doi:10.1038/s41422-023-00778-3), 2023-02-13
Supplement: 41422_2023_778_MOESM3_ESM.pdf [file 41422_2023_778_MOESM3_ESM.pdf]

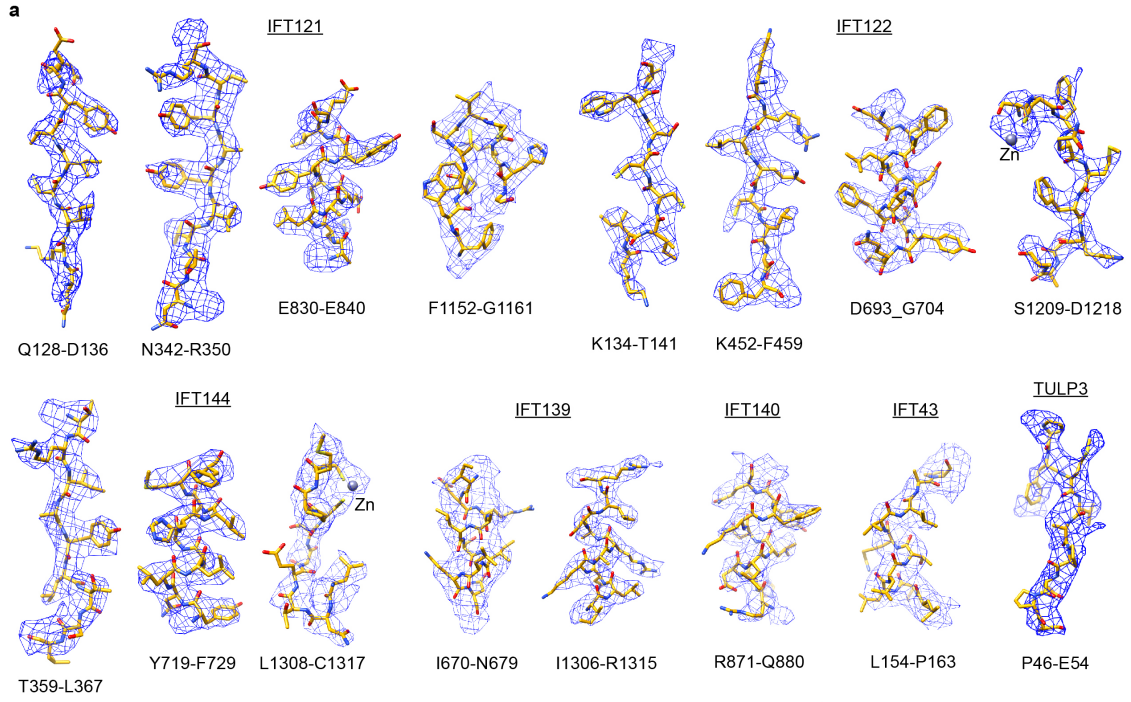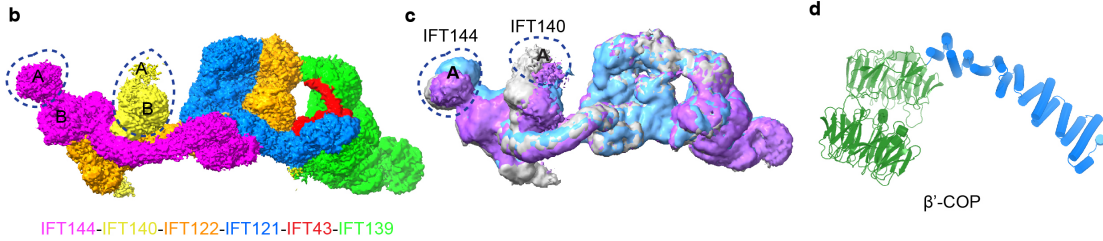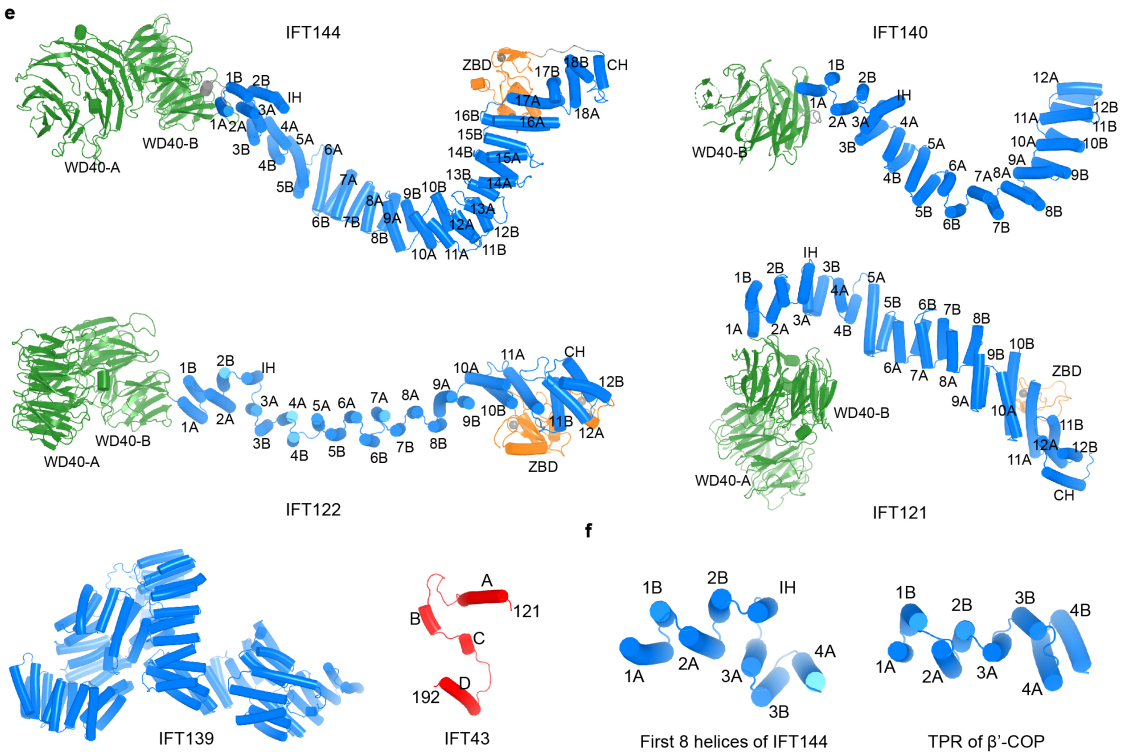

**Supplementary information, Fig. S3: Features of IFT-A complex subunits.**

**a**, Representative local densities with refined model for each IFT-A subunit, zinc and TULP3. **b**, IFT-A map contoured at a low threshold. The flexible WD40 domains of IFT144 and IFT140 are indicated by dashed lines. **c**, Different conformations of IFT-A resulted from 3D classification. The flexible WD40-A domains of IFT140 and IFT144 are indicated by dashed circles. **d**, The structure of  $\beta'$ -COP. **e**, Structural model of each IFT-A subunit. WD40, TPR-like and zinc-binding domains are colored in green, blue and orange, respectively. **f**, The first 4 TPR or TPR-like repeats of IFT144 and  $\beta'$ -COP. The insertion helix of the IFT144 TPR-like domain is indicated as "IH".
