# Supplementary material for: Human IFT-A complex structures provide molecular insights into ciliary transport
Source: PubMed Central journal article supplement (PMC10066299; doi:10.1038/s41422-023-00778-3), 2023-02-13
Supplement: 41422_2023_778_MOESM4_ESM.pdf [file 41422_2023_778_MOESM4_ESM.pdf]

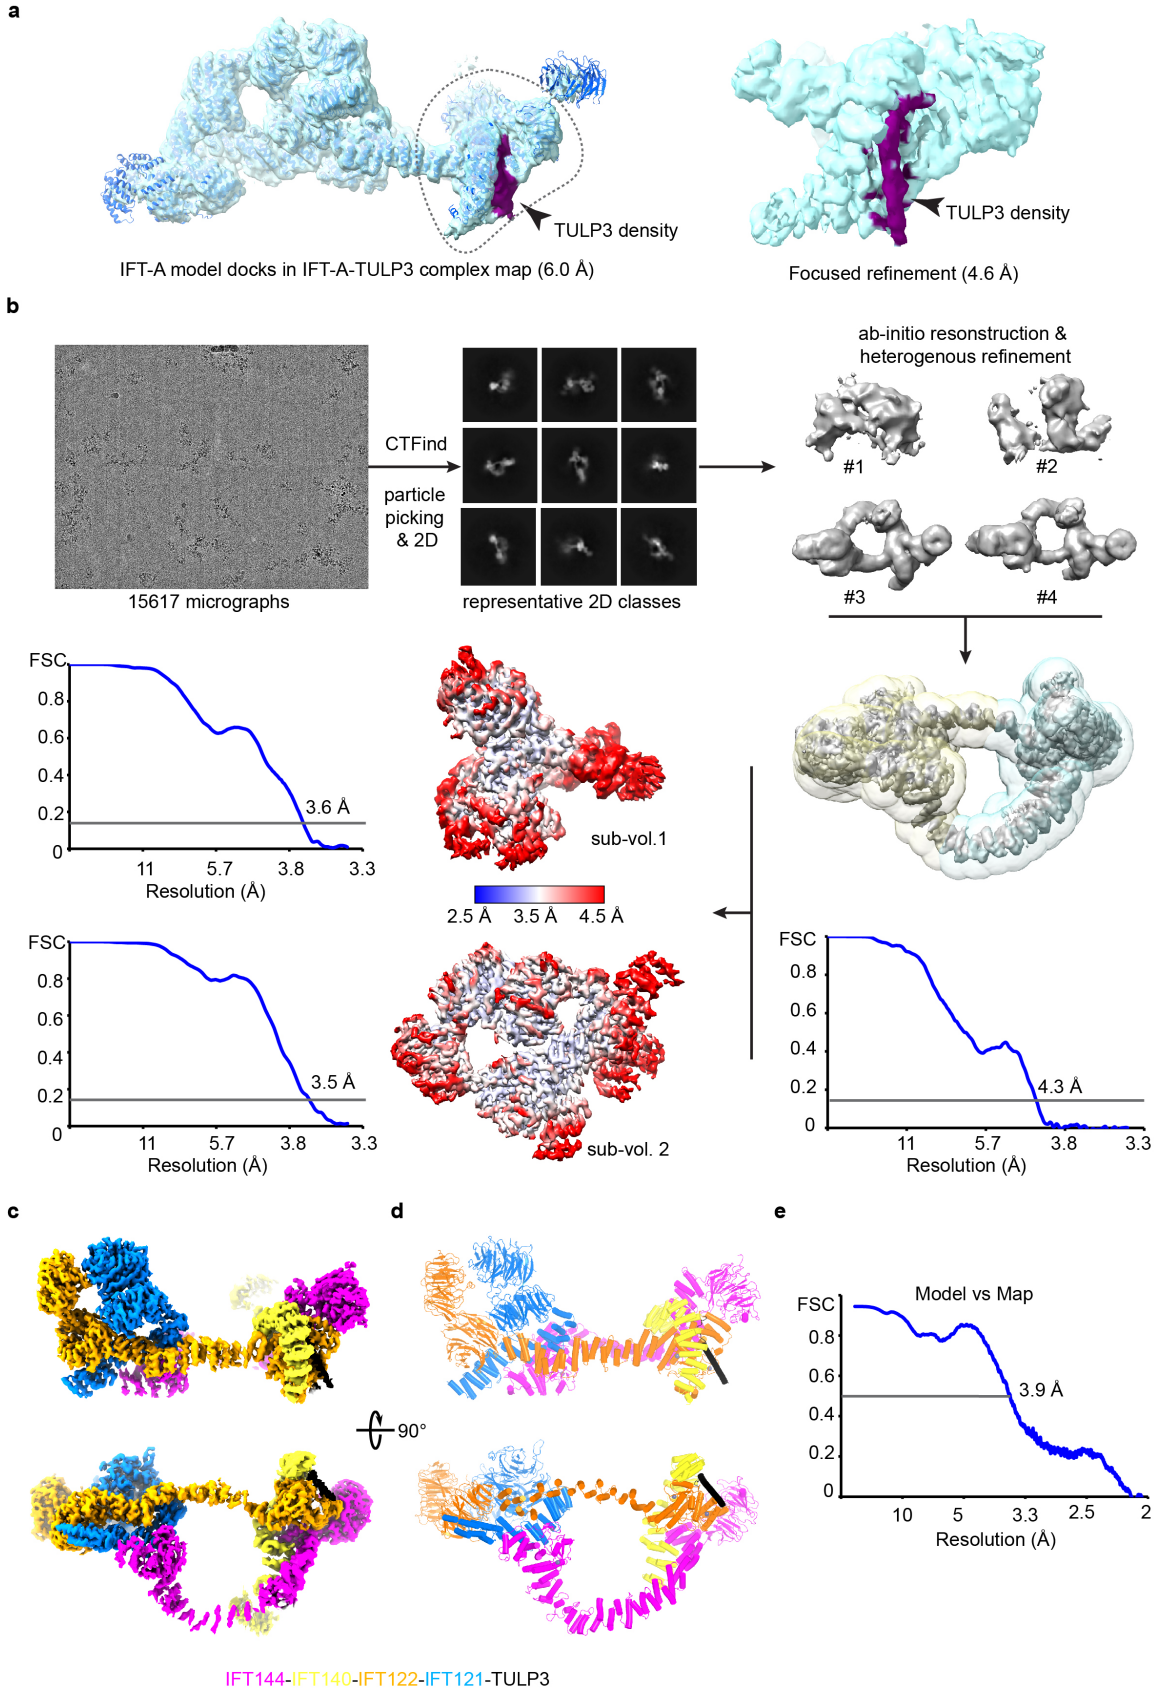

**Supplementary information, Fig. S4: Structural determination of the IFT-A–TULP3 complex.**

**a**, Low-resolution map of the IFT-A–TULP3 complex. IFT-A and TULP3 are colored in cyan and purple, respectively. **b**, A simplified flowchart of the data process protocol of the IFT-A–TULP3 complex without IFT139. Focused refinement was performed for two sub-volumes. Sub-volume 1 contains the TULP3, IFT144, IFT140 and part of the IFT122 subunits and sub-volume 2 contains most of the IFT121 and IFT122 subunits. Local resolutions are calculated and shown. **c-d**, The composite map and atomic model of the IFT-A–TULP3 complex without IFT139. IFT43 is not resolved. **e**, the FSC curve between the model (**d**) and composite map (**c**).
