# Supplementary material for: Human IFT-A complex structures provide molecular insights into ciliary transport
Source: PubMed Central journal article supplement (PMC10066299; doi:10.1038/s41422-023-00778-3), 2023-02-13
Supplement: 41422_2023_778_MOESM5_ESM.pdf [file 41422_2023_778_MOESM5_ESM.pdf]

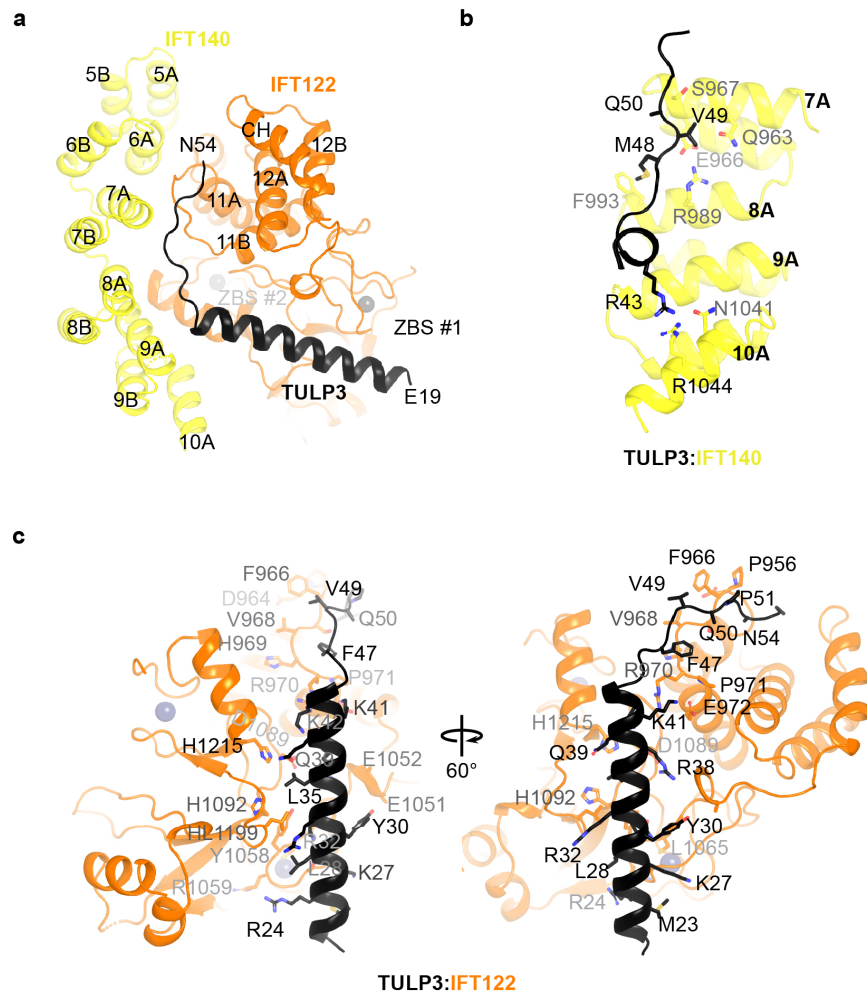

**Supplementary information, Fig. S5: Interactions between IFT-A and TULP3.**

**a**, The binding site of TULP3. **b**, Interactions between TULP3 and IFT140 with side chains of interacting residues shown as sticks. **c**, Interactions between TULP3 and IFT122.
