# Supplementary material for: Human IFT-A complex structures provide molecular insights into ciliary transport
Source: PubMed Central journal article supplement (PMC10066299; doi:10.1038/s41422-023-00778-3), 2023-02-13
Supplement: 41422_2023_778_MOESM6_ESM.pdf [file 41422_2023_778_MOESM6_ESM.pdf]

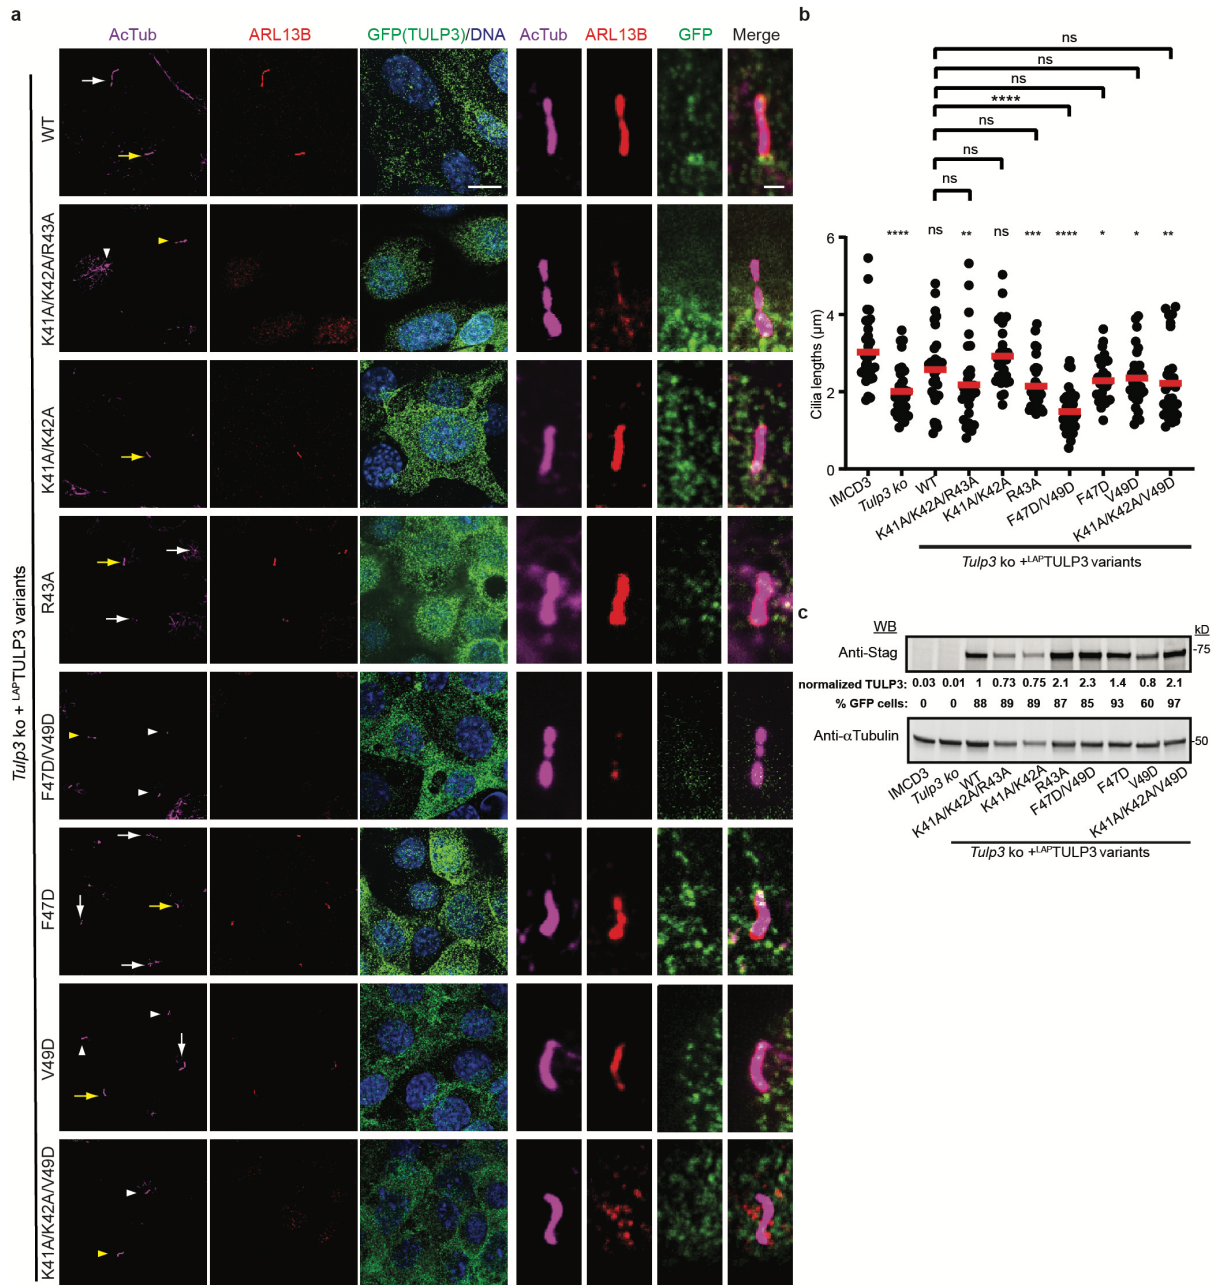

**Supplementary information, Fig. S6: Ciliary trafficking of ARL13B with TULP3 mutants.**

**a**, Representative cell images quantified in Fig. 4c are shown. *Tulp3* ko IMCD3 line stably expressing LAP-tagged wild type (WT) TULP3 or indicated mutant were grown to confluence, serum starved for 36 h before fixation and immunostained for ARL13B (red), GFP (green), acetylated tubulin (magenta) and counterstained for DNA. Maximum intensity Z-projections of

stacks at the plane of the cilia (red/magenta channels) or nuclei (green channel) are shown in the left panels. Arrows and arrowheads indicate cilia positive and negative for indicated proteins, respectively. Yellow arrow/arrowhead marked cilia are shown in the right insets that show maximum intensity Z-projection at the plane of the cilia. Scale, 5  $\mu\text{m}$ ; insets, 1  $\mu\text{m}$ . **b**, Quantification of cilium length in the presence of wild type or LAP-tagged *TULP3* variants stably expressed in *Tulp3* ko IMCD3 cells. Comparisons of the lines with respect to IMCD3 or with respect to stably expressing LAP-tagged *TULP3*<sup>WT</sup> in *Tulp3* ko cells are shown. \*\*\*\*,  $p < 0.0001$ ; \*\*\*,  $p < 0.001$ ; \*\*,  $p < 0.01$ ; \*,  $p < 0.05$ .; ns, not significant **c**, Western blot of wild type or LAP-tagged *TULP3* variants stably expressed in *Tulp3* ko IMCD3 cells. The amounts of LAP-tagged *TULP3* and mutants are normalized to  $\alpha$ -tubulin. The percentage of GFP-expressing cells is also indicated. LAP, EGFP-TEV-S tag-X.
