# Supplementary material for: Human IFT-A complex structures provide molecular insights into ciliary transport
Source: PubMed Central journal article supplement (PMC10066299; doi:10.1038/s41422-023-00778-3), 2023-02-13
Supplement: 41422_2023_778_MOESM8_ESM.pdf [file 41422_2023_778_MOESM8_ESM.pdf]

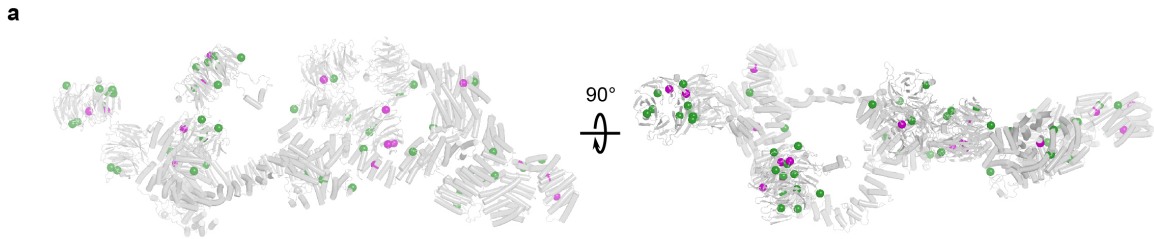

**b**

|         | IFT144                                                                       | IFT140                                                                            | IFT122                     | IFT121                 | IFT139                                                        | IFT43 |
|---------|------------------------------------------------------------------------------|-----------------------------------------------------------------------------------|----------------------------|------------------------|---------------------------------------------------------------|-------|
| exposed | L7, V68, G109, D159, F249, R272, N273, G294, D493, G495, R1178, D1235, C1267 | H24, G140, L152, I233, E267, R280, Y311, T484, G522, R576, E664, E790, R871, S939 | W7, S322, F570, G572, L712 | W261, R478, E626, D841 | P209, P466, S591, H566, D755, L795, R867, M1101, M1186, Y1167 | W174  |
| buried  | A30, V345, L710                                                              | A212, V292, A418, C663, A974                                                      | V391, G495, V502           | W331, A875             | A44, W150, T231, A235, A499, L1202                            | n.a   |

**Supplementary information, Fig. S8: Disease mutations of IFT-A complexes.**

**a**, The disease mutations mapped based on solvent accessibility using the same model in Fig. 6. Green and purple spheres indicate exposed and buried residues, respectively. **b**, Solvent accessibility of disease mutations. The accessibility is calculated using chimera, and residues with  $<2.5 \text{ \AA}$  solvent accessible surface are considered buried.
