# Supplementary material for: Human IFT-A complex structures provide molecular insights into ciliary transport
Source: PubMed Central journal article supplement (PMC10066299; doi:10.1038/s41422-023-00778-3), 2023-02-13
Supplement: 41422_2023_778_MOESM10_ESM.pdf [file 41422_2023_778_MOESM10_ESM.pdf]

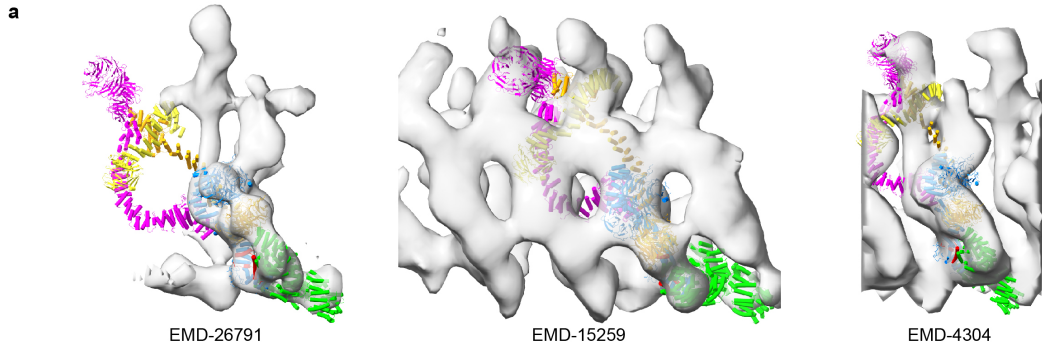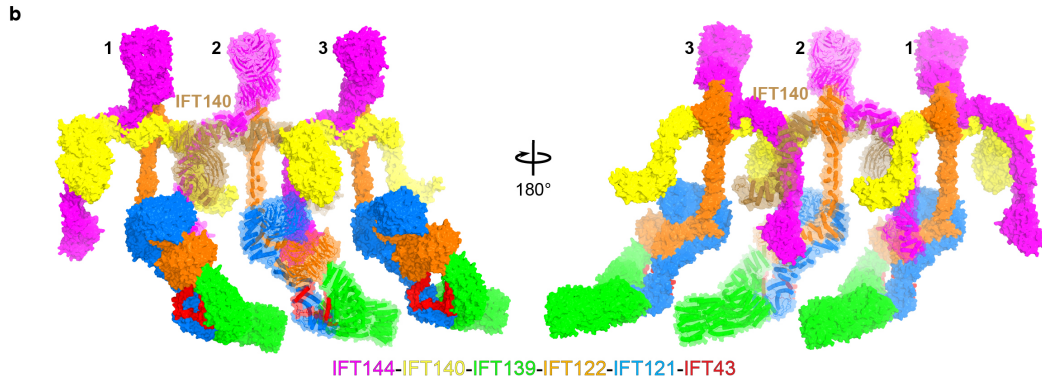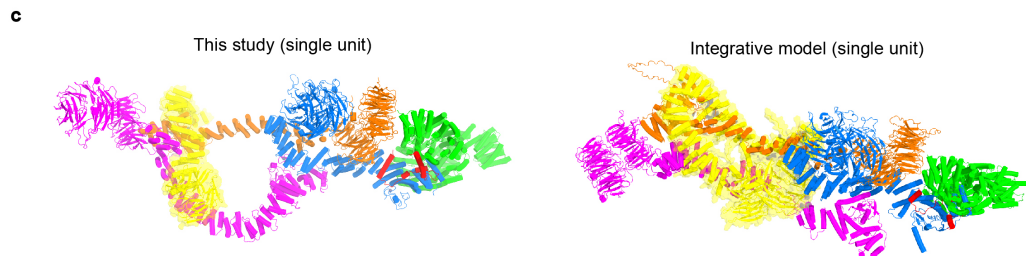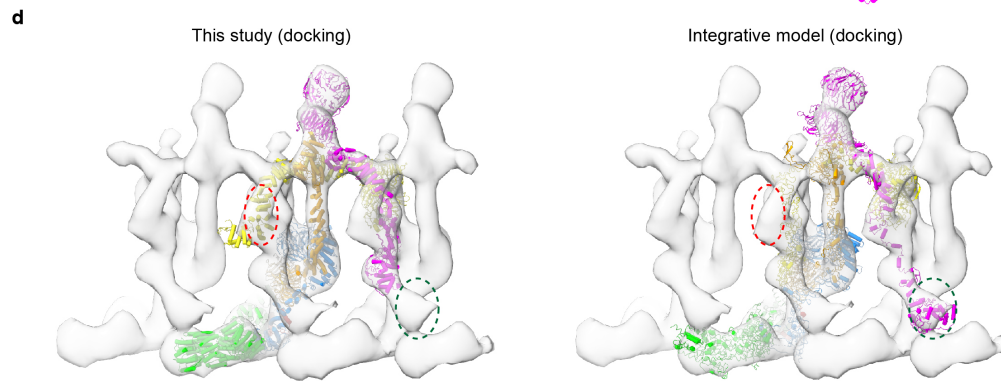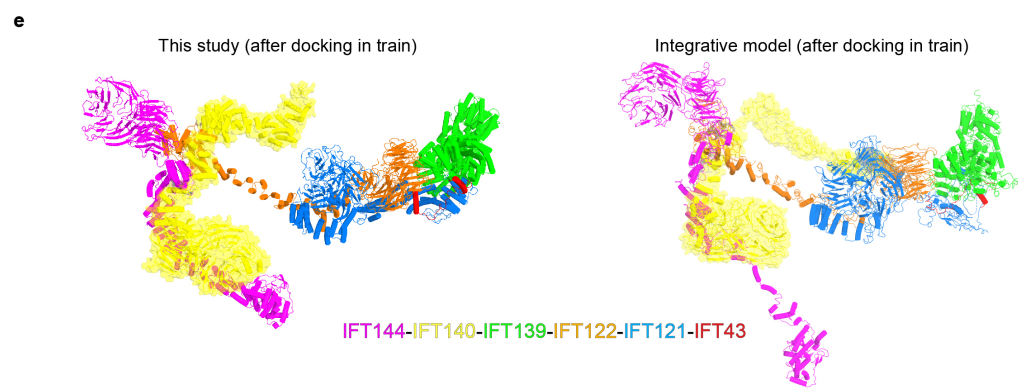

**Supplementary information, Fig. S10: Model of the IFT-A train.**

**a**, Rigid-body-based docking of the IFT-A model to the cryo-ET maps (EMD-26791, EMD-15259 and EMD-4304), showing non-perfect fitting. **b**, Model of IFT-A polymer with three copies of IFT-A. IFT140 of the middle copy is colored in wheat for clarity. **c**, The conformation differences between our IFT-A structure and the integrative model as monomers. **d**, The differences between the docking results of our work and the integrative model. Red dashed circles indicate the C-terminal part of IFT140, and green dashed circles indicate unexplained density in our study. **e**, The differences in the IFT-A models after docking into the cryo-ET map.
