# Supplementary material for: Human IFT-A complex structures provide molecular insights into ciliary transport
Source: PubMed Central journal article supplement (PMC10066299; doi:10.1038/s41422-023-00778-3), 2023-02-13
Supplement: 41422_2023_778_MOESM11_ESM.pdf [file 41422_2023_778_MOESM11_ESM.pdf]

**Supplementary information, Table S1. Cryo-EM data collection, refinement and validation statistics**

|                                                  | IFT-A<br>(EMDB: EMD-29073)<br>(PDB: 8FGW)                                    | IFT-A (-IFT139)                                  | IFT-A-TULP3<br>(-IFT139)<br>(EMDB: EMD-29078)<br>(PDB: 8FH3) | IFT-A-TULP3 |
|--------------------------------------------------|------------------------------------------------------------------------------|--------------------------------------------------|--------------------------------------------------------------|-------------|
| <b>Data collection and processing</b>            |                                                                              |                                                  |                                                              |             |
| Magnification                                    | 81,000                                                                       | 105,000                                          | 81,000                                                       | 63,000      |
| Voltage (kV)                                     | 300                                                                          | 300                                              | 300                                                          | 200         |
| Electron exposure (e-/Å <sup>2</sup> )           | 66.2                                                                         | 76.2                                             | 53.06                                                        | 82.5        |
| Defocus range (µm)                               | -0.6 – -1.8                                                                  | -0.6 – -1.8                                      | -0.6 – -2.0                                                  | -0.6 – -1.8 |
| Pixel size (Å)                                   | 0.5285                                                                       | 0.413                                            | 0.5285                                                       | 0.6572      |
| Symmetry imposed                                 | C1                                                                           | C1                                               | C1                                                           | C1          |
| Initial particle images (no.)                    | 1,649,804                                                                    | 1,962,671                                        | 2,136,547                                                    | 485,077     |
| Final particle images (no.)                      | 67,560                                                                       | 180,200                                          | 113,784                                                      | 61,090      |
| Map resolution (Å)                               | Overall: 3.7<br>Sub-vol.1: 3.9<br>Sub-vol.2: 3.0                             | Overall: 3.6<br>Sub-vol.3: 3.0<br>Sub-vol.4: 3.2 | Overall: 4.3<br>Sub-vol.1: 3.6<br>Sub-vol.2: 3.5             | 6.0         |
| FSC threshold                                    | 0.143                                                                        | 0.143                                            | 0.143                                                        | 0.143       |
| Map resolution range (Å)                         |                                                                              |                                                  |                                                              |             |
| <b>Refinement</b>                                |                                                                              |                                                  |                                                              |             |
| Initial model used (PDB code)                    | <i>De novo</i> /AF2                                                          |                                                  | <i>De novo</i> /AF2                                          |             |
| Model resolution (Å)                             | 3.2                                                                          |                                                  | 3.9                                                          |             |
| FSC threshold                                    | 0.5                                                                          |                                                  | 0.5                                                          |             |
| Model resolution range (Å)                       | 3.2 – 57.5                                                                   |                                                  | 3.9 – 50                                                     |             |
| Map sharpening <i>B</i> factor (Å <sup>2</sup> ) | Sub-vol.1: -97.0<br>Sub-vol.2: -72.6<br>Sub-vol.3: -88.2<br>Sub-vol.4: -77.5 |                                                  | Sub-vol.1: -68.7<br>Sub-vol.2: -89.2                         |             |
| <b>Model composition</b>                         |                                                                              |                                                  |                                                              |             |
| Non-hydrogen atoms                               | 43596                                                                        |                                                  | 26774                                                        |             |
| Protein residues                                 | 5564                                                                         |                                                  | 3642                                                         |             |
| Ligands                                          | 5                                                                            |                                                  | 5                                                            |             |
| <b><i>B</i> factors (Å<sup>2</sup>)</b>          |                                                                              |                                                  |                                                              |             |
| Protein                                          | 69.318                                                                       |                                                  | 62.157                                                       |             |
| Ligand                                           | 75.272                                                                       |                                                  | 189.004                                                      |             |
| <b>R.m.s. deviations</b>                         |                                                                              |                                                  |                                                              |             |
| Bond lengths (Å)                                 | 0.015                                                                        |                                                  | 0.010                                                        |             |
| Bond angles (°)                                  | 0.852                                                                        |                                                  | 0.983                                                        |             |
| <b>Validation</b>                                |                                                                              |                                                  |                                                              |             |
| MolProbity score                                 | 2.02                                                                         |                                                  | 2.17                                                         |             |
| Clashscore                                       | 13.25                                                                        |                                                  | 15.79                                                        |             |
| Poor rotamers (%)                                | 0                                                                            |                                                  | 0                                                            |             |
| <b>Ramachandran plot</b>                         |                                                                              |                                                  |                                                              |             |
| Favored (%)                                      | 94.26                                                                        |                                                  | 92.57                                                        |             |
| Allowed (%)                                      | 5.74                                                                         |                                                  | 7.43                                                         |             |
| Disallowed (%)                                   | 0                                                                            |                                                  | 0                                                            |             |
